# Supplementary material for: Rapid synthesis of polyester based single-chain polymeric nanoparticles via an intra-molecular aza-Michael addition reaction
Source: Royal Society of Chemistry journal article supplement (doi:10.1039/d1py01631h), 2022-01-01
Supplement: d1py01631h1.pdf [file d1py01631h1.pdf]

## SUPPORTING INFORMATION

### **Rapid Synthesis of Polyester Based Single-Chain Polymeric Nanoparticles via Intra-Molecular Aza-Michael Addition Reaction**

Burcu Alkan<sup>a,b</sup>, Ozgun Daglar<sup>a</sup>, Binnur Aydogan Temel<sup>c</sup>, Hakan Durmaz<sup>a,\*</sup>, Gokhan Temel<sup>d,\*</sup>

<sup>a</sup> Department of Chemistry, Istanbul Technical University, 34469 Maslak, Istanbul, Turkey

<sup>b</sup> Yalova Vocational School, University of Yalova, 77200 Yalova, Turkey

<sup>c</sup> Department of Pharmaceutical Chemistry, Faculty of Pharmacy, Bezmialem Vakif University, Fatih, Istanbul 34093, Turkey

<sup>d</sup> Department of Polymer Material Engineering, Faculty of Engineering, Yalova University, Yalova, 77200, Turkey

## Synthesis of Poly(1,4-cyclohexanedimethylene acetylene dicarboxylate) (PCA)

Acetylenedicarboxylic acid (2.0 g, 17.5 mmol) was dissolved in 80 mL of benzene and stirred under nitrogen, 1,4-cyclohexanedimethanol (2.53 g, 17.54 mmol) and PTSA (0.34 g, 1.79 mmol) were added to the solution in that order. The mixture was gradually heated in a round-bottomed flask, with a Dean-Stark apparatus attached, in an oil bath set to 100 °C and stirred 8 h at this temperature. After that time, the solvent was removed under reduced pressure, THF was added to the residue and the mixture was precipitated in methanol. The dissolution-precipitation (THF-methanol) procedure was repeated two times. The obtained polymer was dried in a vacuum oven at room temperature for 24 h.  $^1\text{H}$  NMR ( $\text{CDCl}_3$ ,  $\delta$ ) 4.17-4.08 (m, 4 H,  $\text{CH}_2\text{CH}$ ), 1.94-1.05 (m, 10 H, aliphatic protons of cyclohexane);  $^{13}\text{C}$  NMR ( $\text{CDCl}_3$ ,  $\delta$ ) 151.88, 74.76, 71.48, 69.40, 36.61, 34.09, 28.43, 24.97.

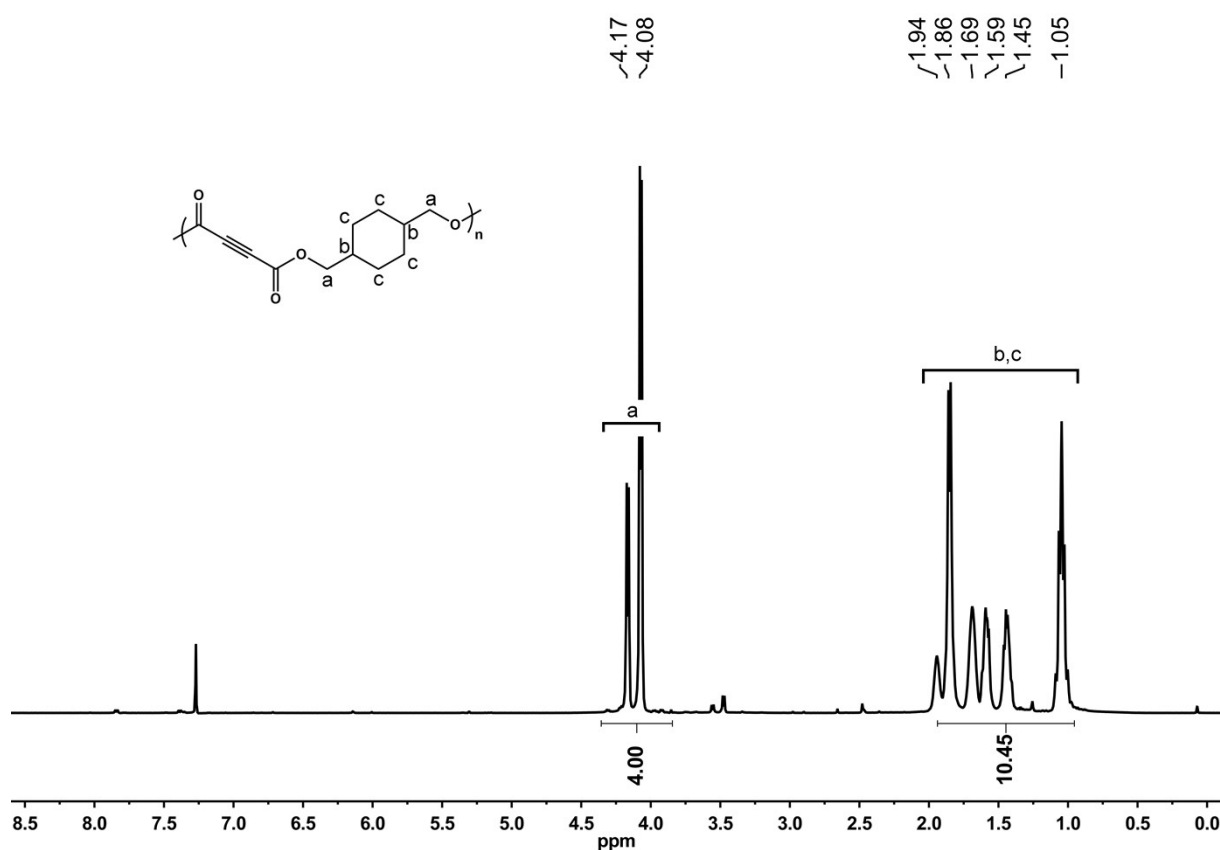

**Figure S1.**  $^1\text{H}$  NMR spectrum of PCA in  $\text{CDCl}_3$  (500 MHz).

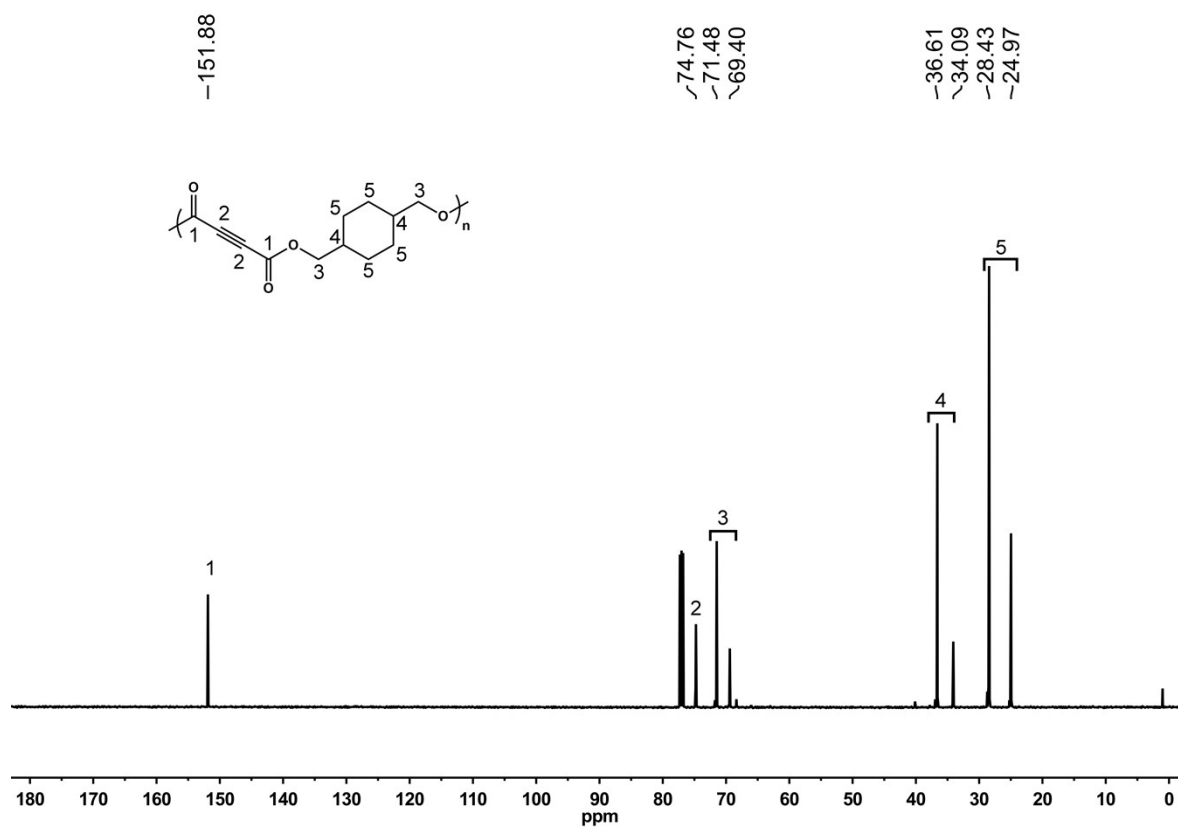

**Figure S2.**  $^{13}\text{C}$  NMR spectrum of PCA in  $\text{CDCl}_3$  (125 MHz).

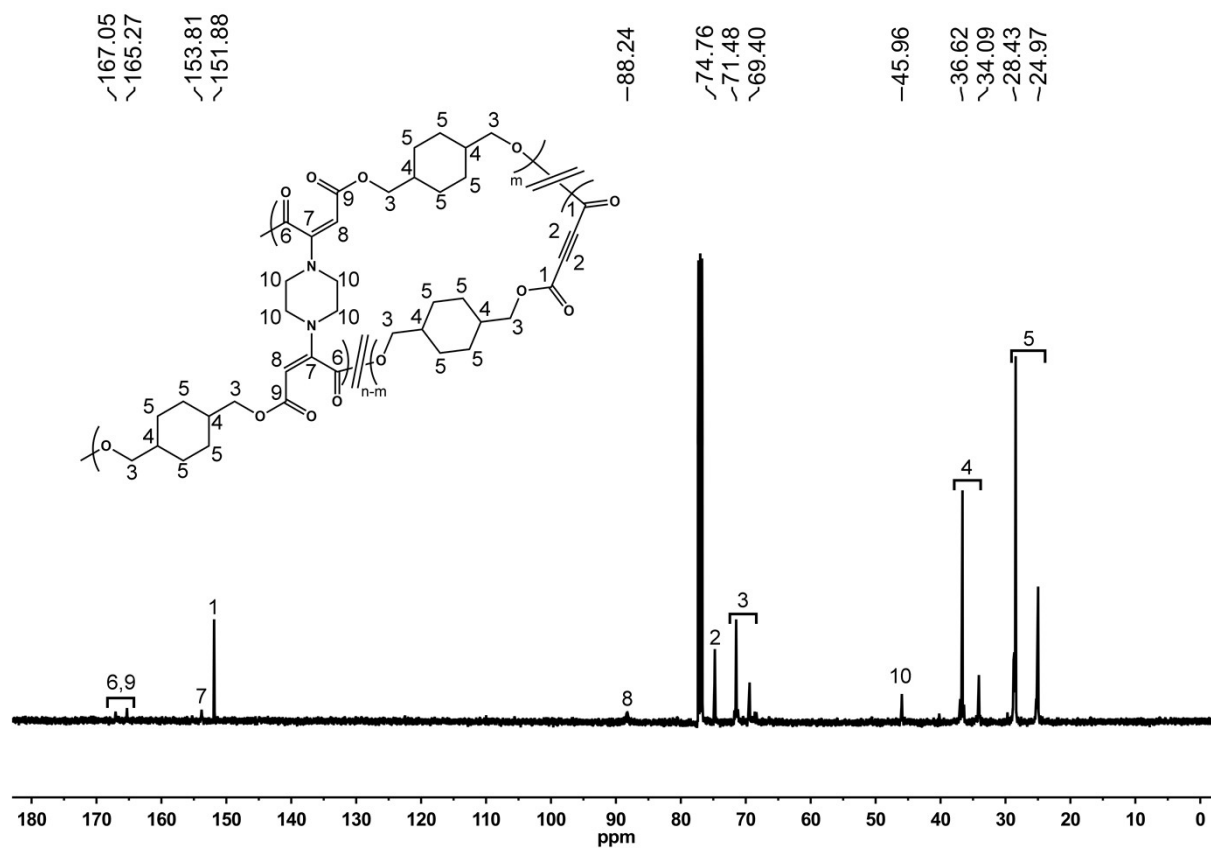

**Figure S3.**  $^{13}\text{C}$  NMR spectrum of SCNP-2 in  $\text{CDCl}_3$  (125 MHz).

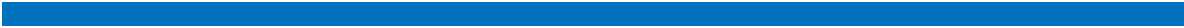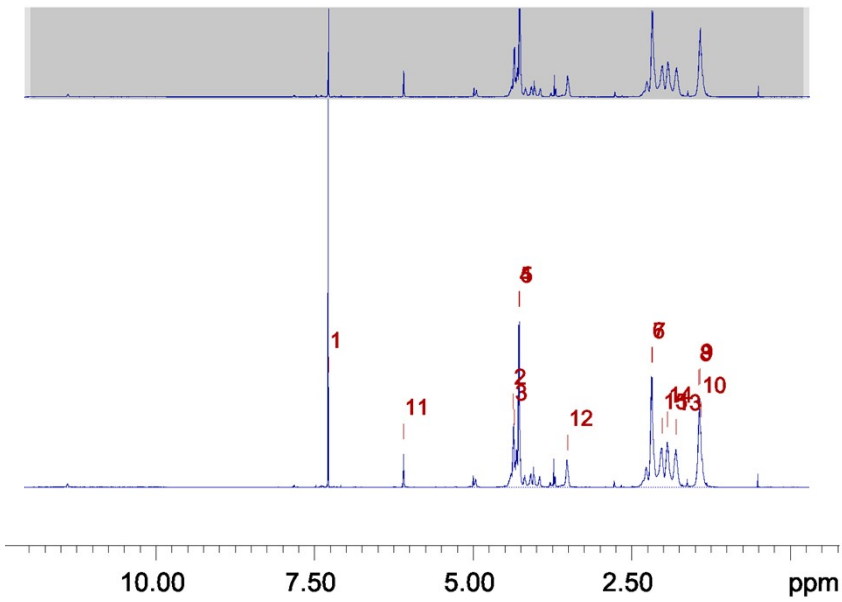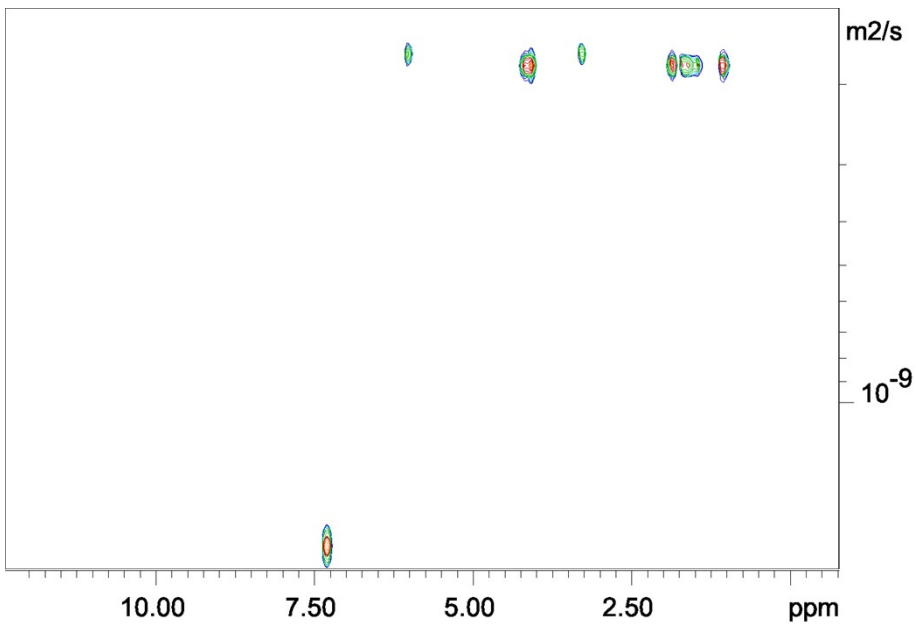

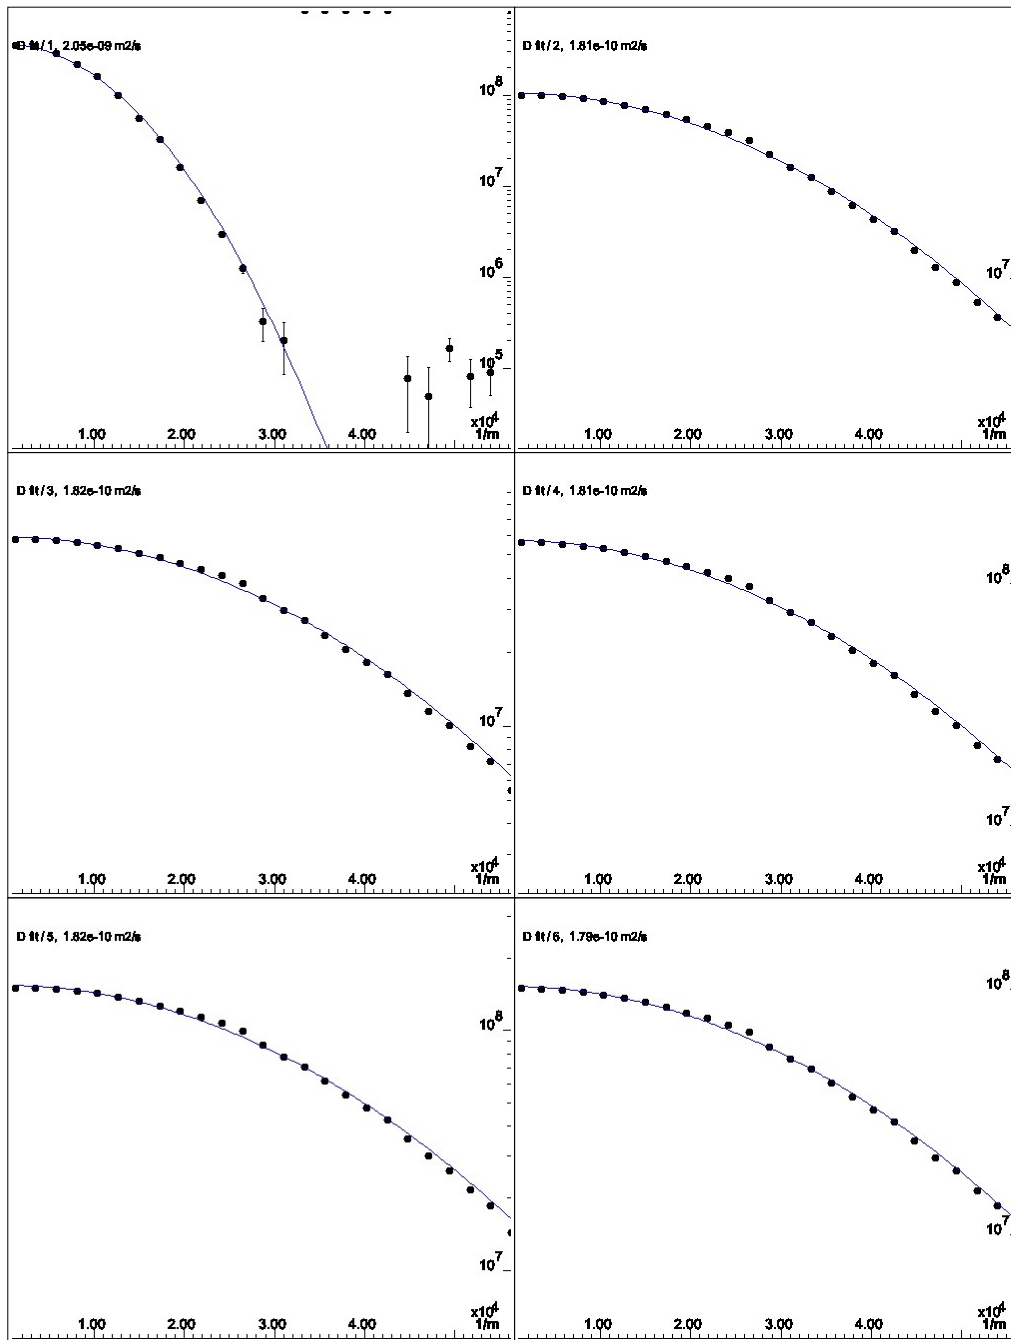

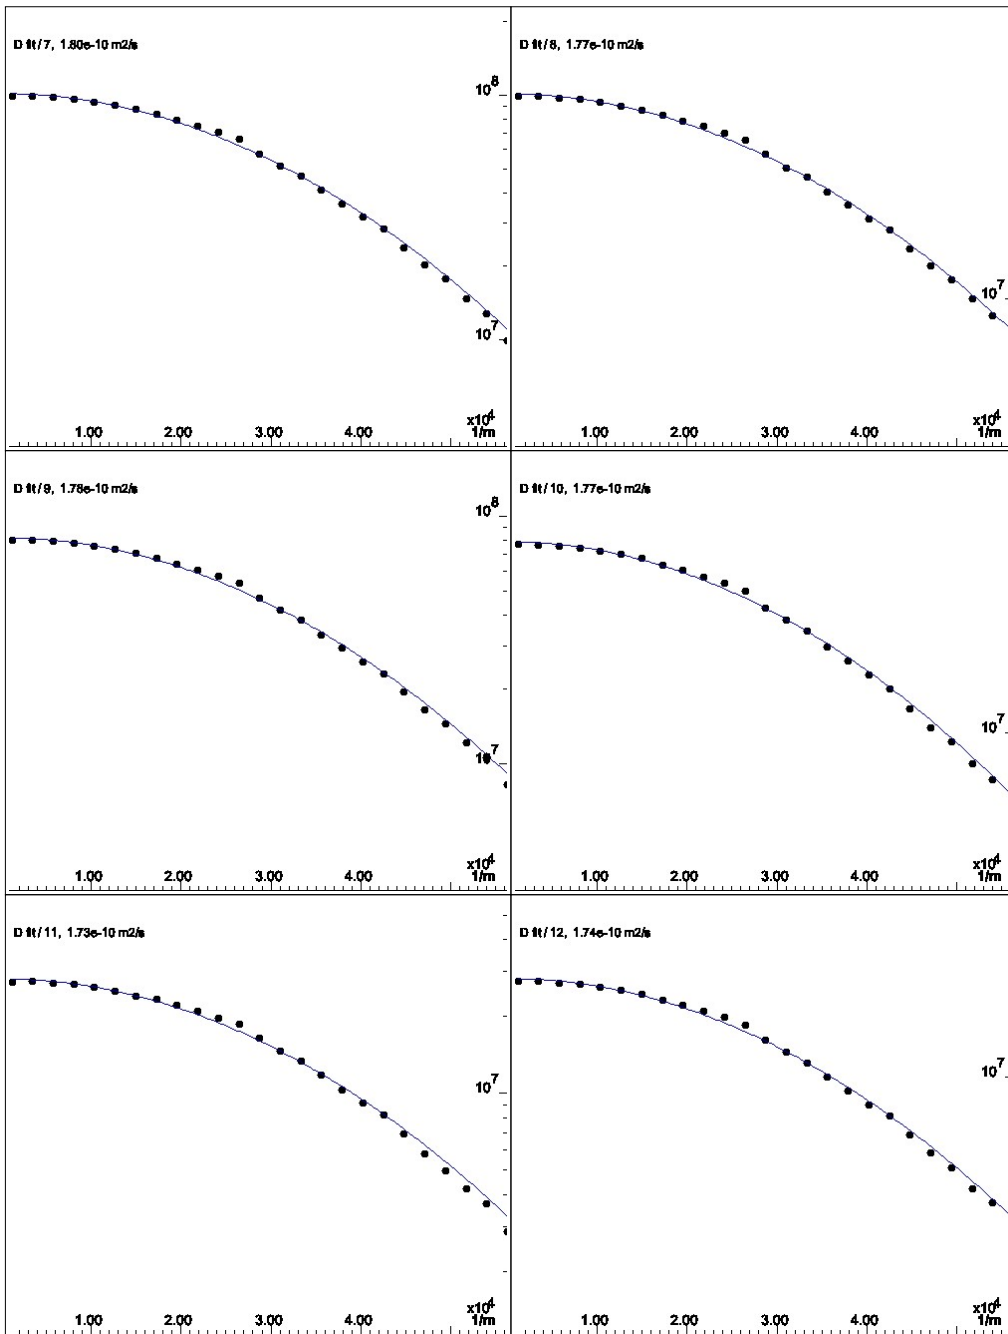

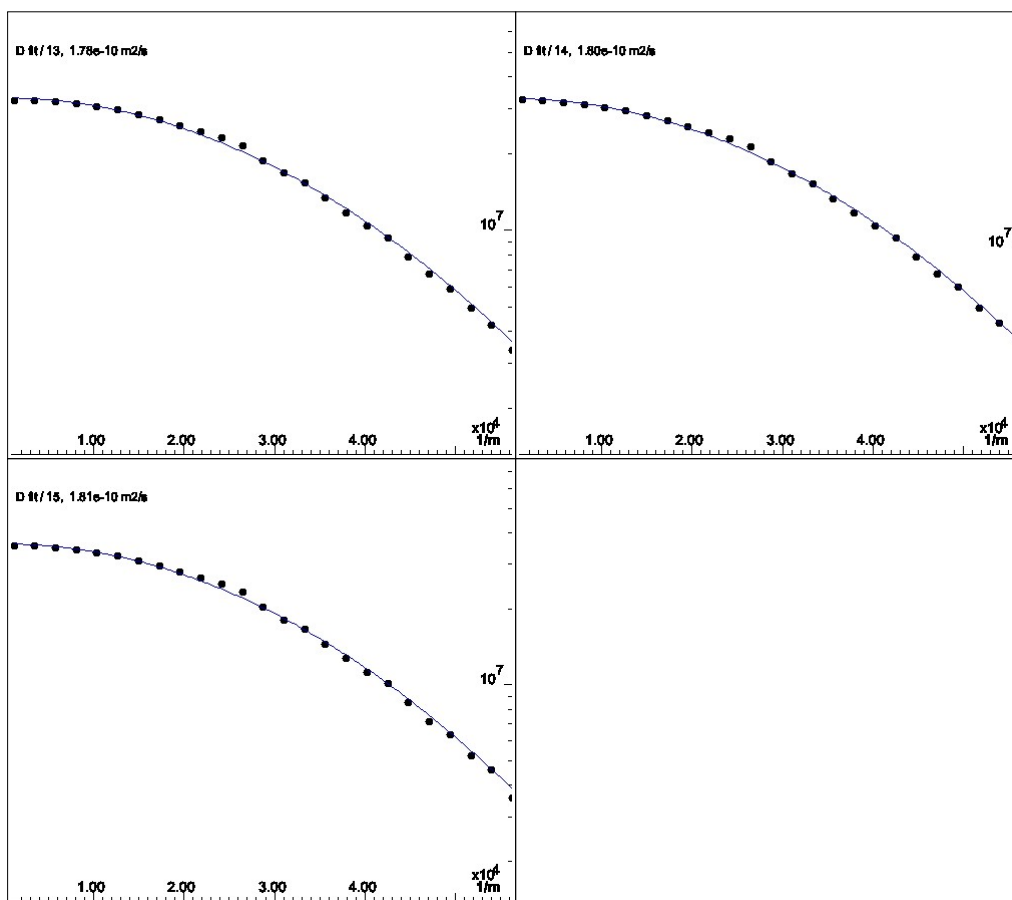

Figure S4. DOSY results of SCNP-1.

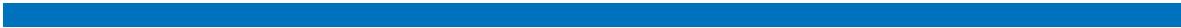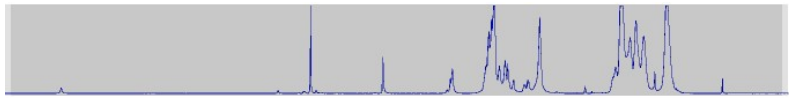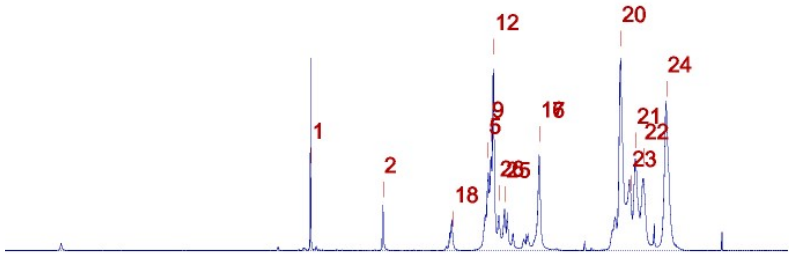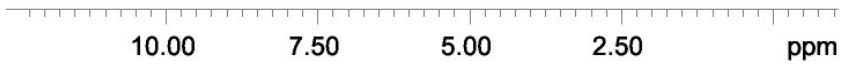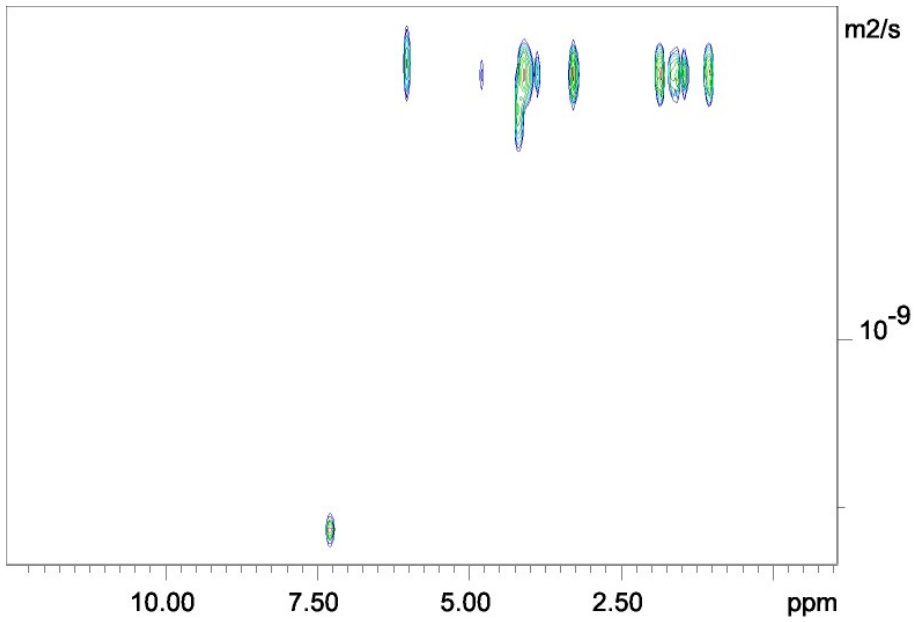



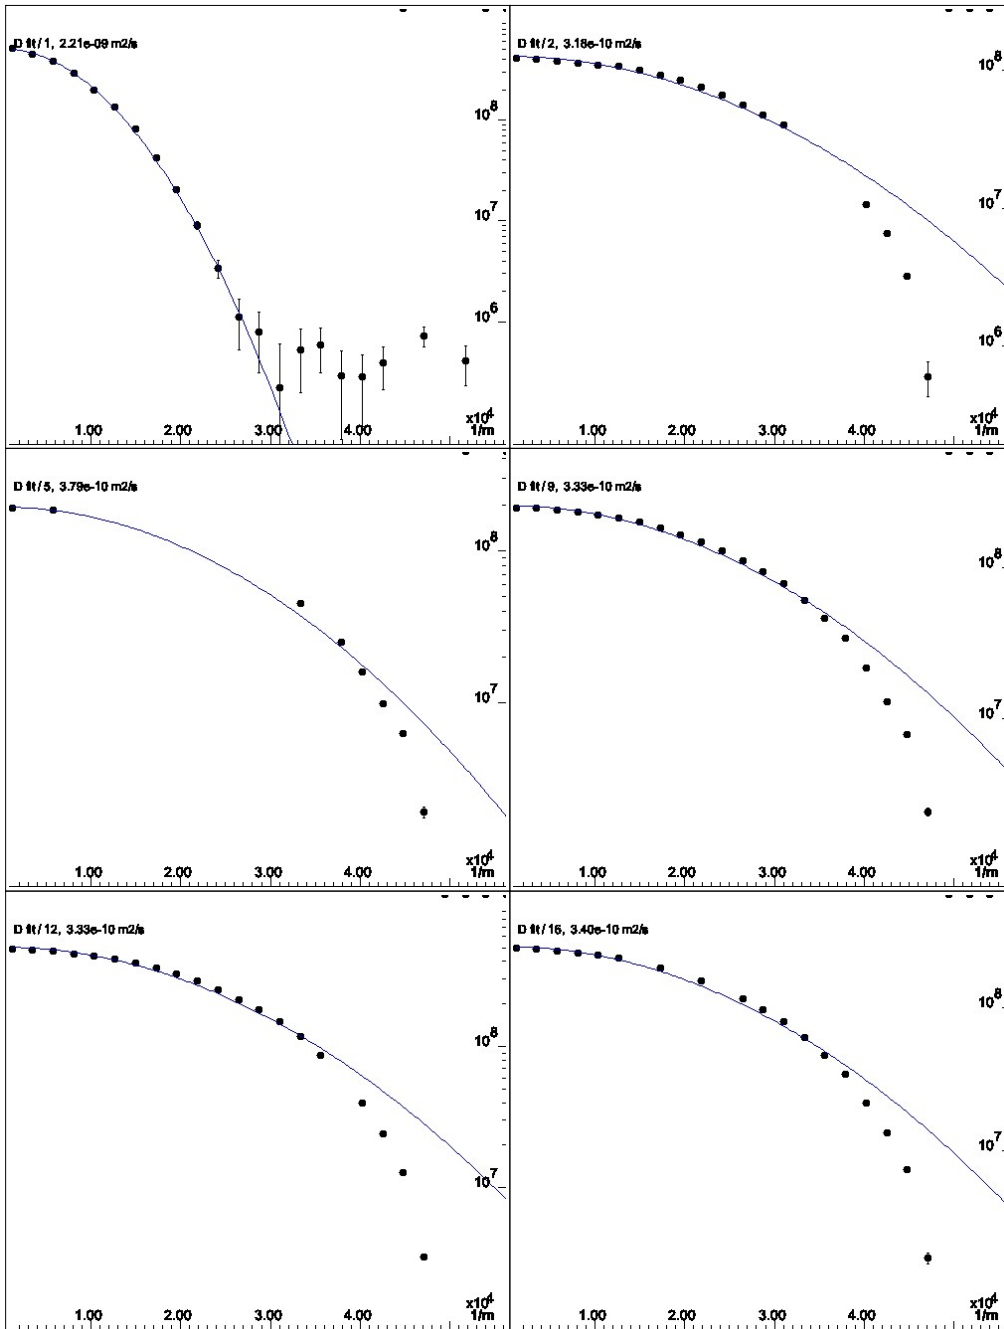

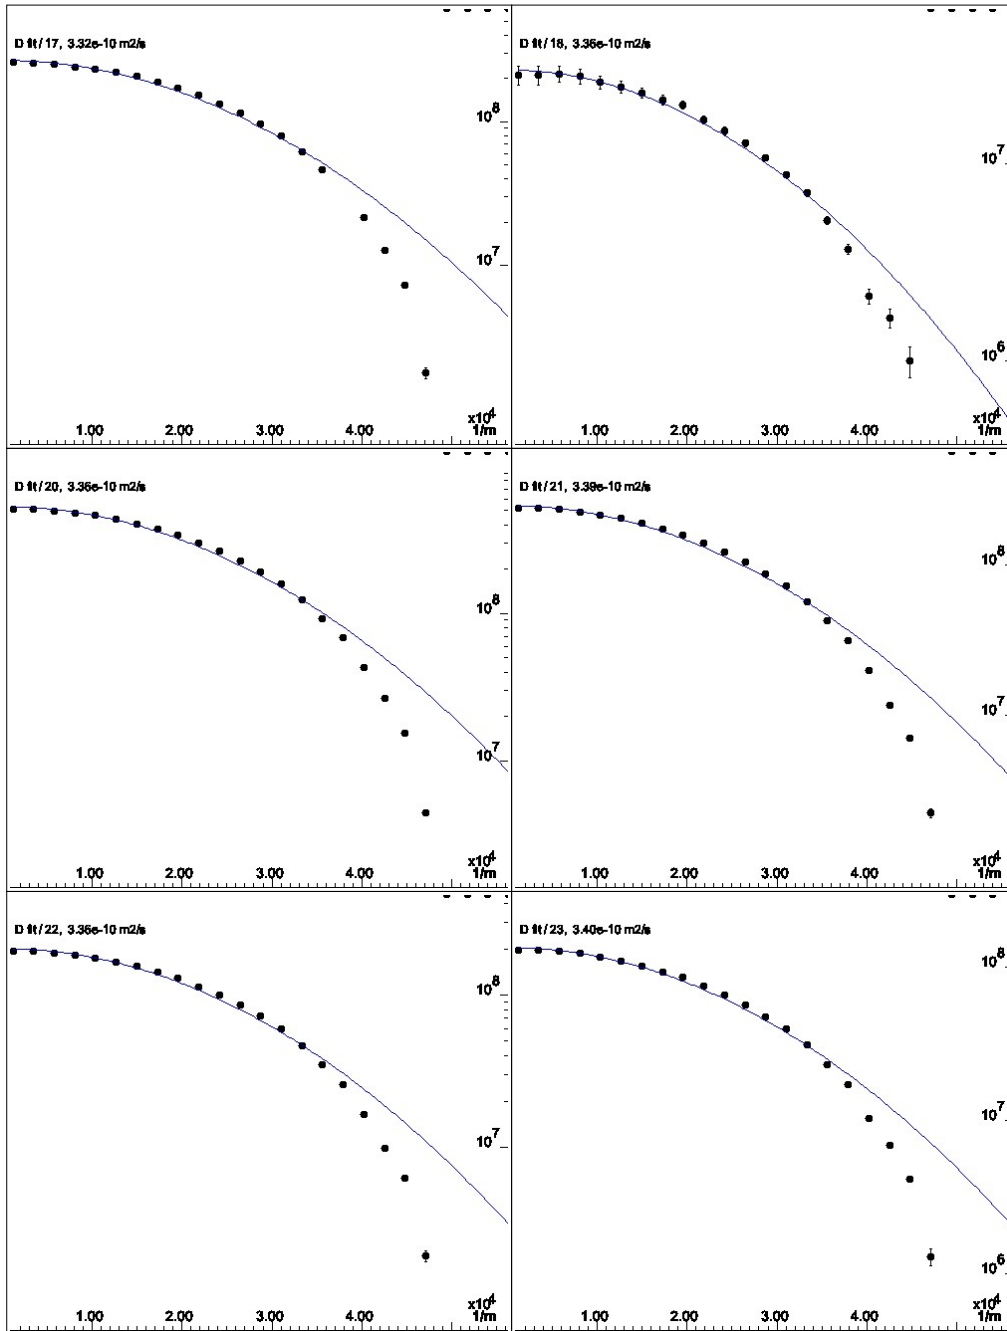

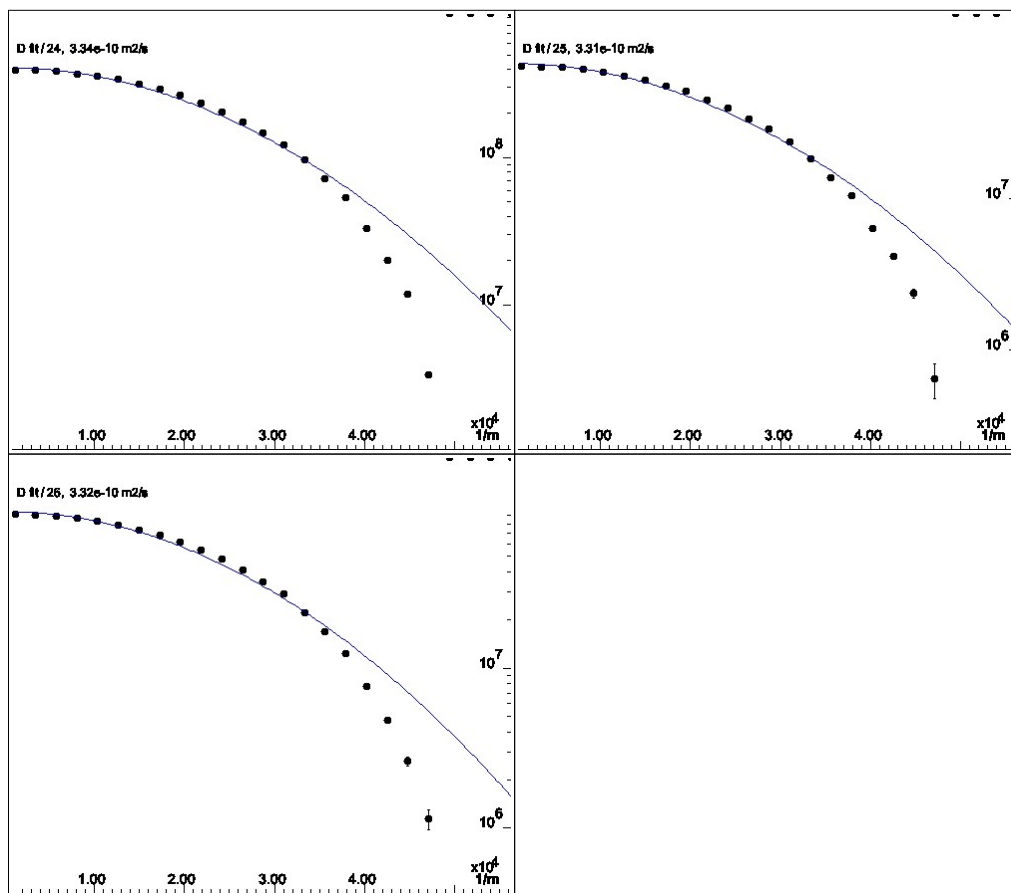

Figure S5. DOSY results of SCNP-3.
